# Supplementary material for: Dynamic MAIT Cell Recovery after Severe COVID-19 Is Transient with Signs of Heterogeneous Functional Anomalies
Source: PubMed Central journal article supplement (PMC10784727; doi:10.4049/jimmunol.2300639), 2023-12-20
Supplement: JI_2300639_Supplemental_1.pdf [file JI_2300639_Supplemental_1.pdf]

**Supplementary Table I.** Demographic and clinical characteristics from the acute stage of the COVID-19 patients included for follow-up at 4-5 months, and 9 months post infection.

|                                                                  |                        | <b>Healthy donors</b> | <b>COVID-19</b> |
|------------------------------------------------------------------|------------------------|-----------------------|-----------------|
| <b>n</b>                                                         |                        | 11                    | 16              |
| <b>Age group (years)</b>                                         | 34-49                  | 27% (3)               | 31% (5)         |
|                                                                  | 50-59                  | 55% (6)               | 31% (5)         |
|                                                                  | 60-69                  | 18% (2)               | 31% (5)         |
|                                                                  | 70-79                  | 0% (0)                | 5% (1)          |
| <b>Gender</b>                                                    | Male                   | 73% (8)               | 81% (13)        |
|                                                                  | Female                 | 27% (3)               | 19% (3)         |
| <b>BMI (median; IQR)</b>                                         |                        | nd                    | 30 ± 8.6        |
| <b>Disease severity</b>                                          | Moderate-severe        | 0%                    | 50% (8)         |
|                                                                  | Severe                 | 0%                    | 50% (8)         |
| <b>Smoking</b>                                                   | No                     | nd                    | 31% (5)         |
|                                                                  | Past                   | nd                    | 13% (2)         |
|                                                                  | Yes                    | nd                    | 25% (4)         |
|                                                                  | Unknown                | nd                    | 31% (5)         |
| <b>Comorbidities</b>                                             | Hypertension           | nd                    | 31% (5)         |
|                                                                  | Diabetes               | nd                    | 31% (5)         |
|                                                                  | Cardiovascular disease | nd                    | 13% (2)         |
| <b>Positive viremia before acute sampling</b>                    |                        | nd                    | 38% (6)         |
| <b>Positive blood culture +/- 5 d before acute sampling</b>      |                        | nd                    | 13% (2)         |
| <b>Positive lower resp culture +/- 5 d before acute sampling</b> |                        | nd                    | 25% (4)         |
| <b>SOFA total before acute sampling</b>                          | 1                      | nd                    | 44% (7)         |
|                                                                  | 2                      | nd                    | 6% (1)          |
|                                                                  | 3                      | nd                    | 31% (5)         |
|                                                                  | 4                      | nd                    | 6% (1)          |
|                                                                  | 7                      | nd                    | 12% (2)         |
| <b>Oxygen treatment before acute sampling</b>                    | Low flow < 15 L/min    | 0%                    | 37% (6)         |
|                                                                  | High flow > 15 L/min   | 0%                    | 25% (4)         |
|                                                                  | Ventilator             | 0%                    | 37% (6)         |
| <b>Steroids prior to acute sampling</b>                          |                        | nd                    | 37% (6)         |
| <b>Antibiotics prior to acute sampling</b>                       |                        | nd                    | 44% (7)         |
| <b>CMV IgG prior to acute sampling</b>                           |                        | nd                    | 94% (15)        |
| <b>SARS-CoV-2 IgG prior to acute sampling</b>                    |                        | 0%                    | 69% (11)        |

BMI: body mass index, GI: Gastrointestinal, CMV: cytomegalovirus, nd: non-determined, IQR: interquartile range.

**Supplementary Table II.** Demographic and clinical characteristics from a second group of COVID-19 patients sampled at four to five months convalescent cross-sectional follow-up.

|                          | <b>COVID-19</b> |
|--------------------------|-----------------|
| <b>n</b>                 | 24              |
| <b>Age group (years)</b> |                 |
| 18–33                    | 3 (13%)         |
| 34–49                    | 5 (21%)         |
| 50–59                    | 9 (38%)         |
| 60–69                    | 7 (29%)         |
| 70–79                    | 0 (0%)          |
| <b>Gender</b>            |                 |
| Male                     | 17 (71%)        |
| Female                   | 7 (29%)         |
| <b>BMI (median; IQR)</b> | 28.4 ± 7.1      |
| <b>Disease severity</b>  |                 |
| Moderate-severe          | 0% (0)          |
| Severe (ICU)             | 100% (24)       |
| <b>Comorbidities</b>     |                 |
| Hypertension             | 50% (12)        |
| Diabetes                 | 13% (3)         |
| Cardiovascular disease   | 17% (4)         |

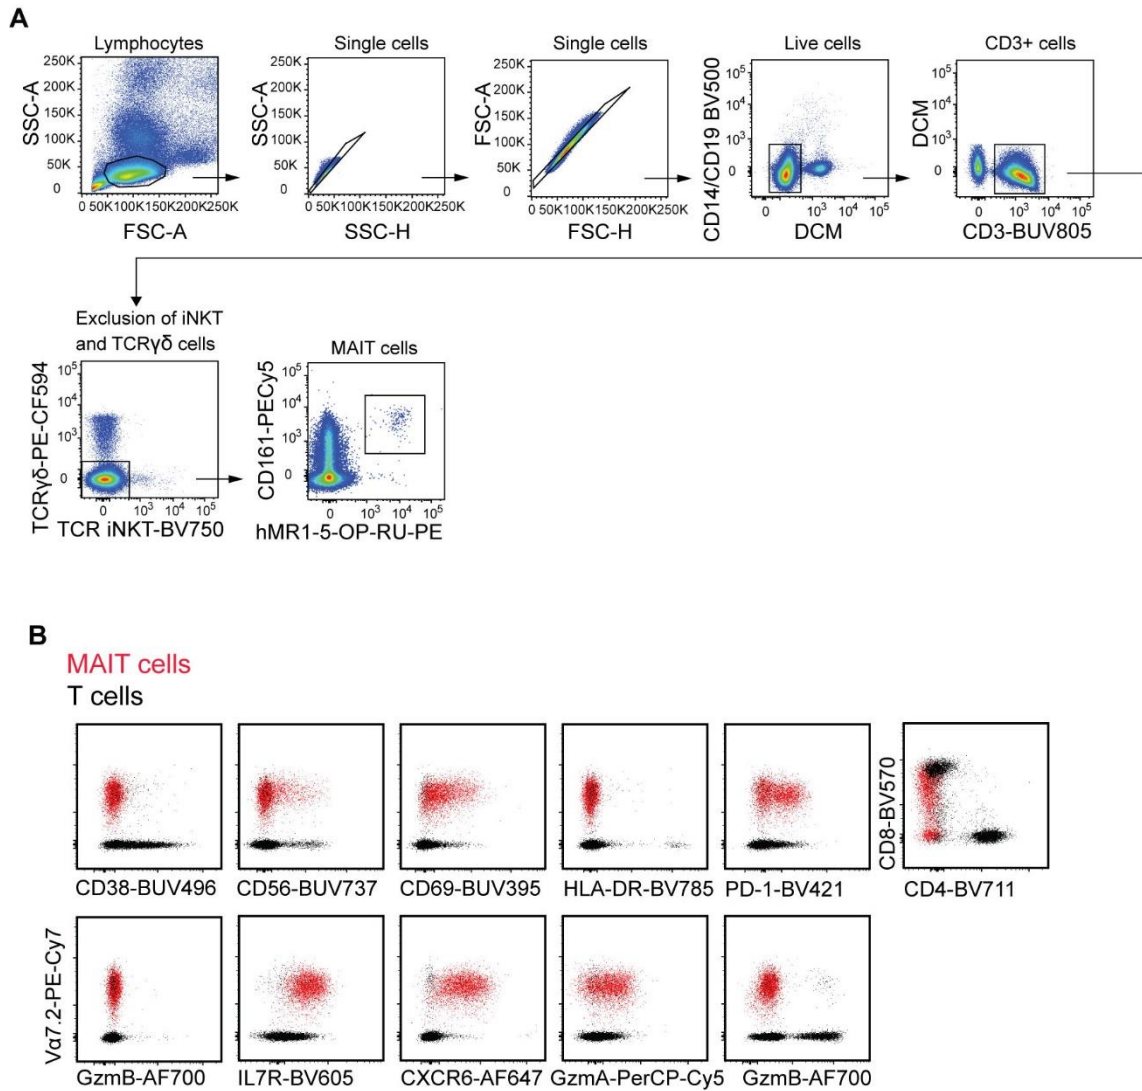

**Supplementary Figure 1. Gating strategy for the phenotypic analysis of MAIT cells.** (A) Representative gating strategy for the identification of MAIT cells. Prior to the gating, data were cleaned using the FlowAI tool that checks for flow stability over time. (B) Representative FACS plots for the gating of CD4, CD8, CD56, CD69, CD38, HLA-DR, Granzyme A, Granzyme B, PD-1, IL-7R, and CXCR6 on MAIT cells. The non-MAIT CD3<sup>+</sup> T cell population in black were used as a reference to set the gates.

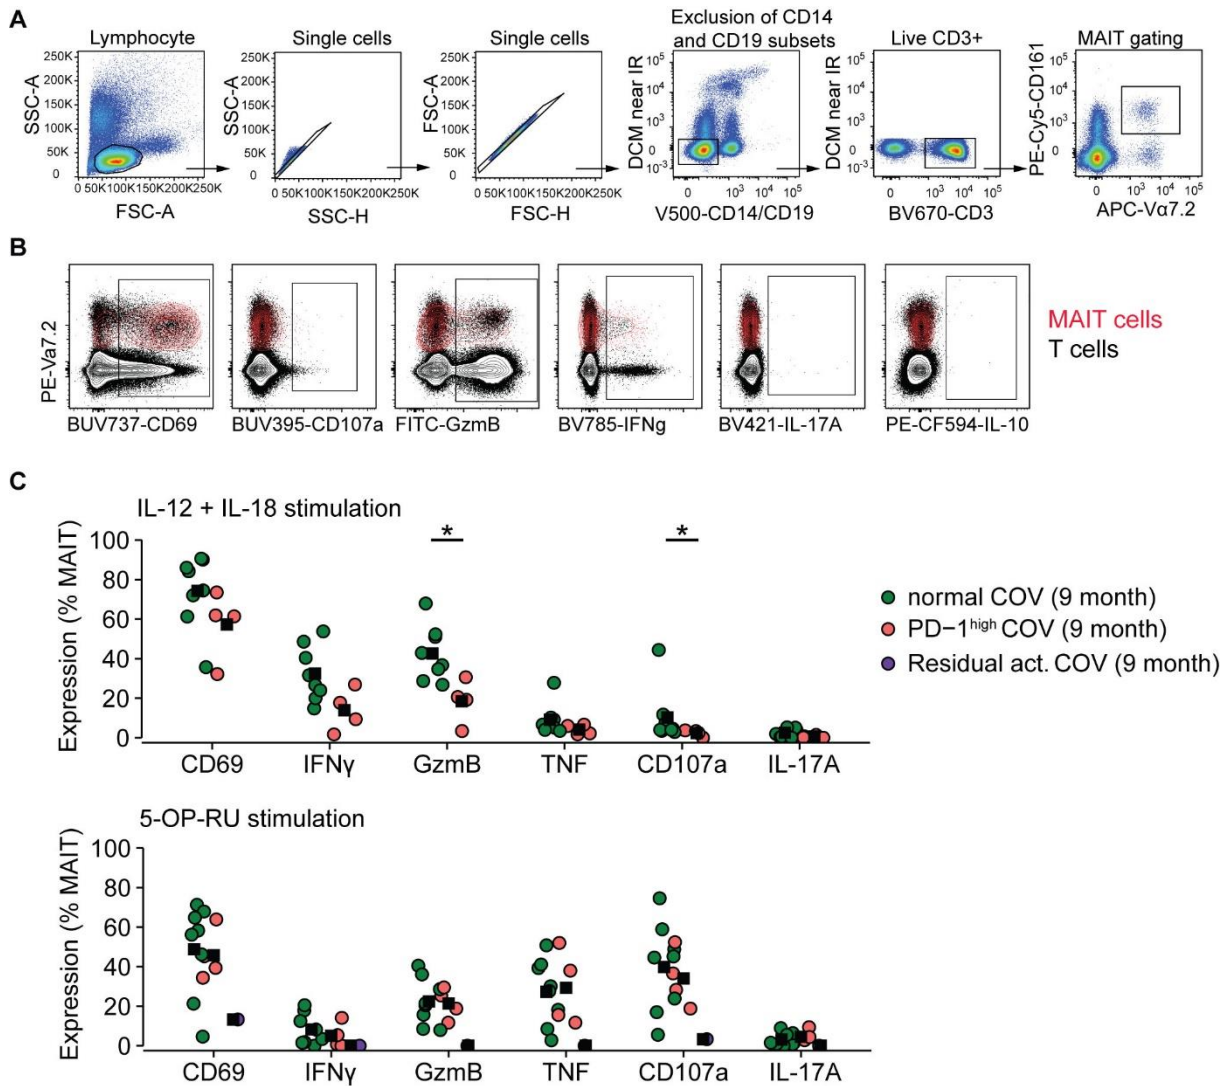

**Supplementary Figure 2. Gating strategy for the functional analysis of MAIT cells.** (A) Representative gating strategy for the identification of MAIT cells. Prior to the gating, data were cleaned using the FlowAI tool that checks for flow stability over time. MAIT cells were gated using CD161 in combination with intracellular staining of Va7.2. (B) Representative FACS plots for the gating of CD69, CD107a, GzmB, IFN $\gamma$ , TNF, IL-17A and IL-10 in MAIT cells. The non-MAIT CD3<sup>+</sup> T cells in black were used as a reference to set the gates. (C) Relative expression of activation, cytokine and effector markers expressed on MAIT cells at the nine-month convalescent phase following IL-12+IL-18 stimulation (top) and 5-OP-RU stimulation (bottom). \*p<0.05.
